# Supplementary material
Source: PubMed Central journal article supplement (PMC5625312)
Supplement: MOL2-11-1399-s001.pdf [file MOL2-11-1399-s001.pdf]

# Supplementary Figure 1

## Signature derived from Luminal cells

## Signature derived from Her2 cells

## Signature derived from Basal cells

microENV(lum) and DMFS in ESR1-/ERBB2- tumors  
(total number=206, unfavourable events=67)

microENV(her2) and DMFS in ESR1-/ERBB2- tumors  
(total number=206, unfavourable events=67)

microENV(basal) and DMFS in ERBB2+ tumors  
(total number=136, unfavourable events=42)

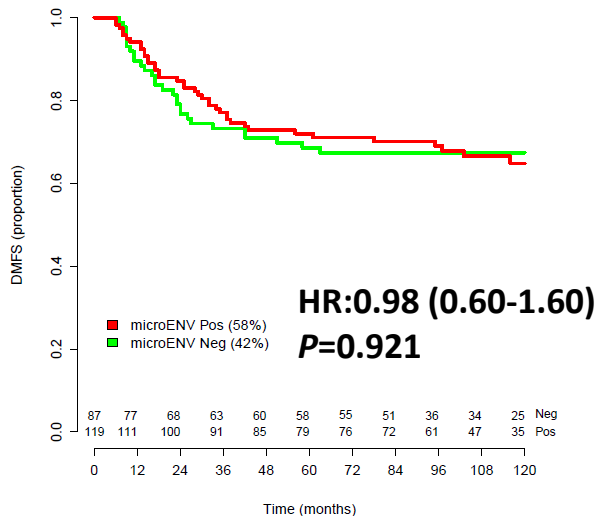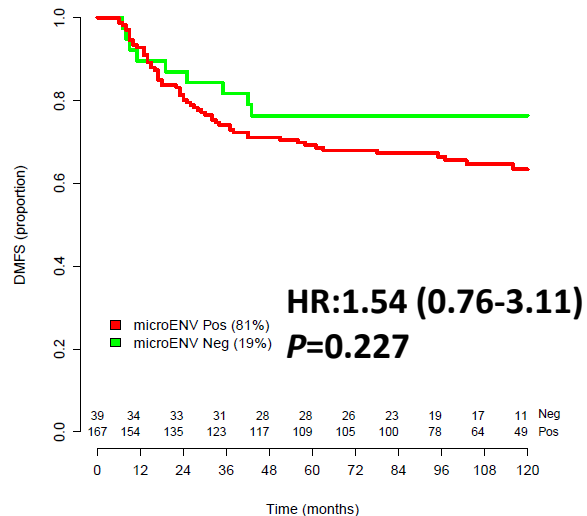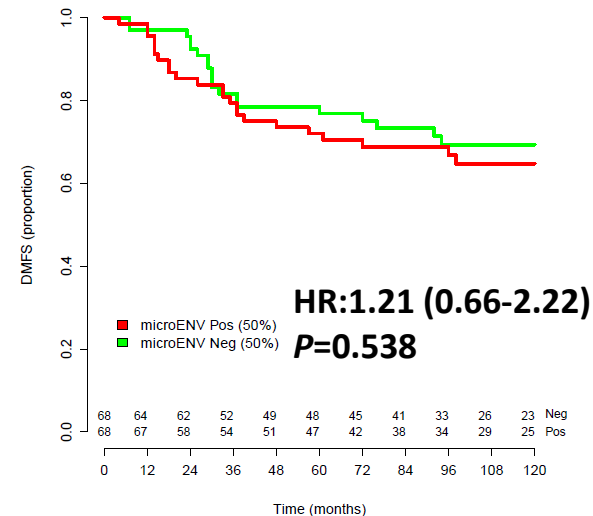

microENV(lum) and DMFS in ERBB2+ tumors  
(total number=136, unfavourable events=42)

microENV(her2) and DMFS in ESR1+/ERBB2- tumors  
(total number=467, unfavourable events=118)

microENV(basal) and DMFS in ESR1+/ERBB2- tumors  
(total number=467, unfavourable events=118)

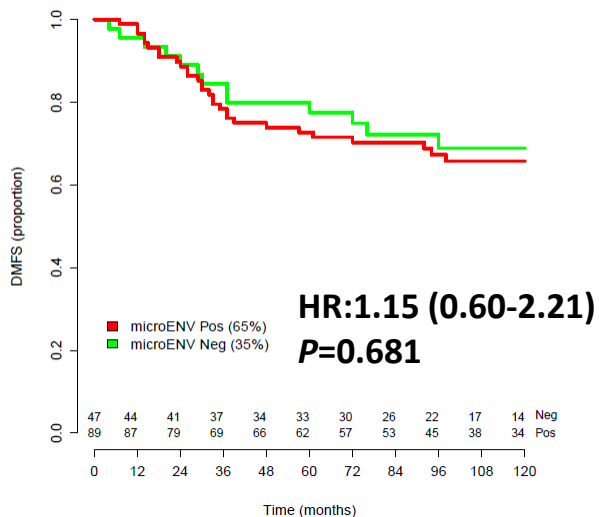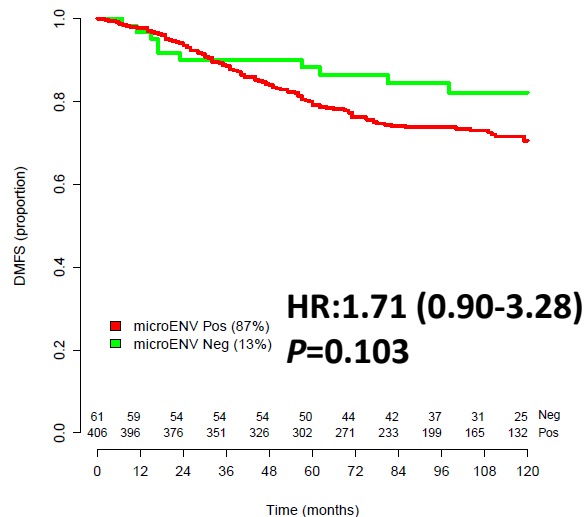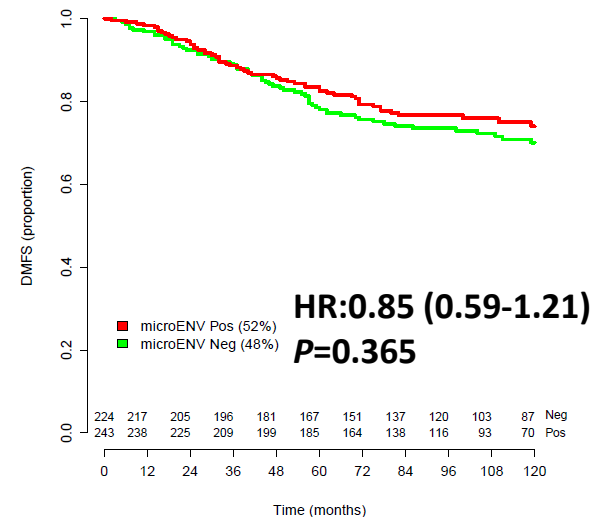

## Supplementary Figure 2

|                   | IL-8 in CM    |            |              | IL-6 in CM    |            |              |
|-------------------|---------------|------------|--------------|---------------|------------|--------------|
|                   | <i>single</i> | <i>NAF</i> | <i>B-CAF</i> | <i>single</i> | <i>NAF</i> | <i>B-CAF</i> |
| <i>SkBr3</i>      | 0.76          | 6.66       | 14.84        | 0.55          | 15.05      | 9.64         |
| <i>T47D</i>       | 0.02          | 1.09       | 43.39        | 0.44          | 14.9       | 9.34         |
| <i>MDA-MB-468</i> | 62.58         | 64.79      | 68.93        | 11.13         | 12.26      | 11.23        |
| <i>NHDF</i>       | 0.86          | nd         | nd           | 0.9           | nd         | nd           |
| <i>B-CAF</i>      | 15.32         | nd         | nd           | 9.55          | nd         | nd           |
