# Supplementary material
Source: PubMed Central journal article supplement (PMC5625312)
Supplement: MOL2-11-1399-s002.pdf [file MOL2-11-1399-s002.pdf]

## Supplementary Figure 2

|                   | IL-8 in CM           |                    |            | IL-6 in CM           |                    |            |
|-------------------|----------------------|--------------------|------------|----------------------|--------------------|------------|
|                   | <i>Mono-cultures</i> | <i>Co-cultures</i> |            | <i>Mono-cultures</i> | <i>Co-cultures</i> |            |
|                   |                      | <i>NAF</i>         | <i>CAF</i> |                      | <i>NAF</i>         | <i>CAF</i> |
| <i>SkBr3</i>      | 0.76                 | 6.66               | 14.84      | 0.55                 | 15.05              | 9.64       |
| <i>T47D</i>       | 0.02                 | 1.09               | 43.39      | 0.44                 | 14.9               | 9.34       |
| <i>MDA-MB-468</i> | 62.58                | 64.79              | 68.93      | 11.13                | 12.26              | 11.23      |
| <i>NHDF</i>       | 0.86                 | nd                 | nd         | 0.9                  | nd                 | nd         |
| <i>B-CAF</i>      | 15.32                | nd                 | nd         | 9.55                 | nd                 | nd         |
